# Supplementary material
Source: MDPI journal article supplement (https://www.mdpi.com/2075-163X/11/3/294)
Supplement: s1 [file s1]

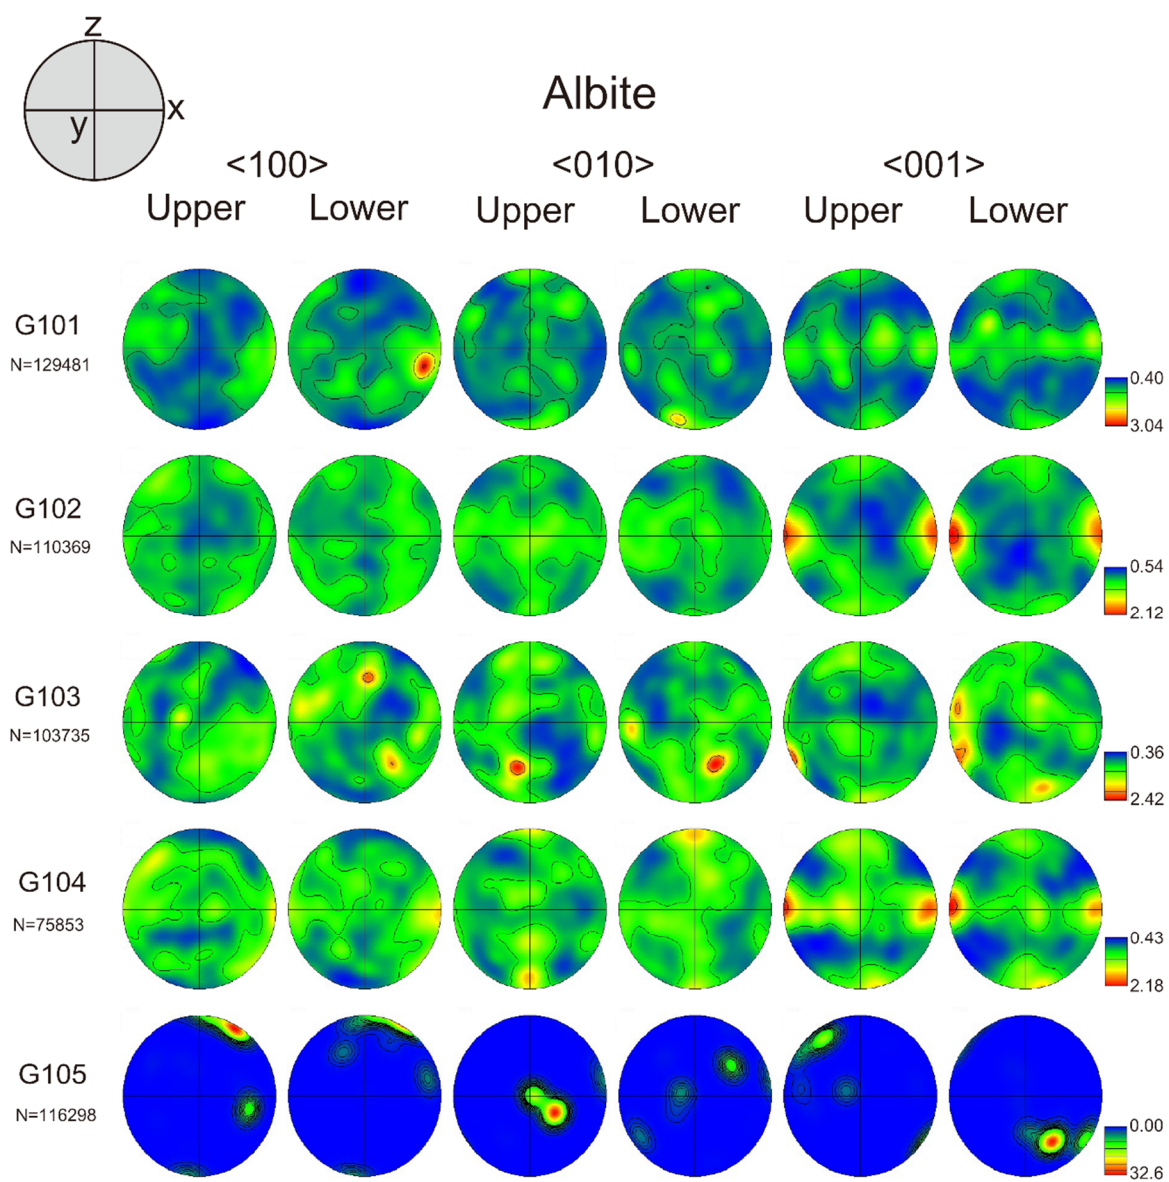

**Figure S1.** Pole figures of the albite axes presented in the lower hemisphere using equal-area projection.
